# Supplementary material for: Bio-Energy Retains Its Mitigation Potential Under Elevated CO2
Source: PLoS One. 2010 Jul 19;5(7):e11648. doi: 10.1371/journal.pone.0011648 (PMC2906505; doi:10.1371/journal.pone.0011648)
Supplement: Table S2 — Components of the life cycle analysis of poplar SRC for biomass production under current ambient and future elevated [CO2] and subsequent combustion in a combined heat and power plant. Avoided CO2 emissions, GHGB and mitigation potential were based on the assumption that gas was substituted by biomass in the combined heat and power plant. Excluding soil carbon dynamics (see Table 2). (0.05 MB DOC) [file pone.0011648.s003.doc]

**Table S2** Components of thelife cycle analysis of poplar SRC for biomass production under current ambient and future elevated [CO2] and subsequent combustion in a combined heat and power plant. Avoided CO2 emissions, GHGB and mitigation potential were based on the assumption that **gas** was substituted by biomass in the combined heat and power plant. Excluding soil carbon dynamics (see Table 2)

|  | Current ambient CO2, 18 years life cycle | | Future Elevated CO2, 18 years life cycle | | Current Ambient CO2, 13 years life cycle | | Future Elevated CO2, 13 years life cycle | |
| --- | --- | --- | --- | --- | --- | --- | --- | --- |
|  | Mean | Std | Mean | Std | Mean | Std | Mean | Std |
| **Avoided CO2 emissions** |  |  |  |  |  |  |  |  |
| CHP (ton CO2 ha-1) | 401 | 17 | 475 | 20 | 311 | 13 | 437 | 18 |
| Electricity from CHP (ton CO2 ha-1) | 196 | 8 | 232 | 10 | 152 | 6 | 213 | 9 |
| CH4 oxidation (ton CO2 equi ha-1) | 0.05 | 0.01 | 0.05 | 0.01 | 0.05 | 0.01 | 0.05 | 0.01 |
| **CO2 emissions** |  |  |  |  |  |  |  |  |
| Electricity use (ton CO2 ha-1) | 41 | 2 | 53 | 3 | 32 | 2 | 48 | 3 |
| Diesel use (ton CO2 ha-1) | 19 | 1 | 21 | 1 | 15 | 1 | 20 | 1 |
| N2O Emissions (ton CO2 equi ha-1) | 14 | 1 | 17 | 1 | 11 | 1 | 16 | 1 |
| Mixed sources (ton CO2 ha-1) | 2.0 | 0.1 | 2.3 | 0.2 | 1.5 | 0.1 | 2.2 | 0.2 |
| **GHG balance** |  |  |  |  |  |  |  |  |
| CHP (ton CO2 equi ha-1) | 18 | 1 | 21 | 2 | 19 | 1 | 27 | 1 |
| Electricity from CHP (ton CO2 equi ha-1) | 7 | 1 | 8 | 1 | 7 | 1 | 10 | 1 |
| **Mitigation potential** |  |  |  |  |  |  |  |  |
| CHP (ton CO2 equi MJ-1) | 44 | 1 | 43 | 1 | 44 | 1 | 43 | 1 |
| Electricity from CHP (ton CO2 equi MJ-1) | 16 | 1 | 16 | 1 | 16 | 1 | 16 | 1 |
